# Supplementary material
Source: PubMed Central journal article supplement (PMC4155416)
Supplement: Supp_Fig1.pdf [file Supp_Fig1.pdf]

## Supplementary Data

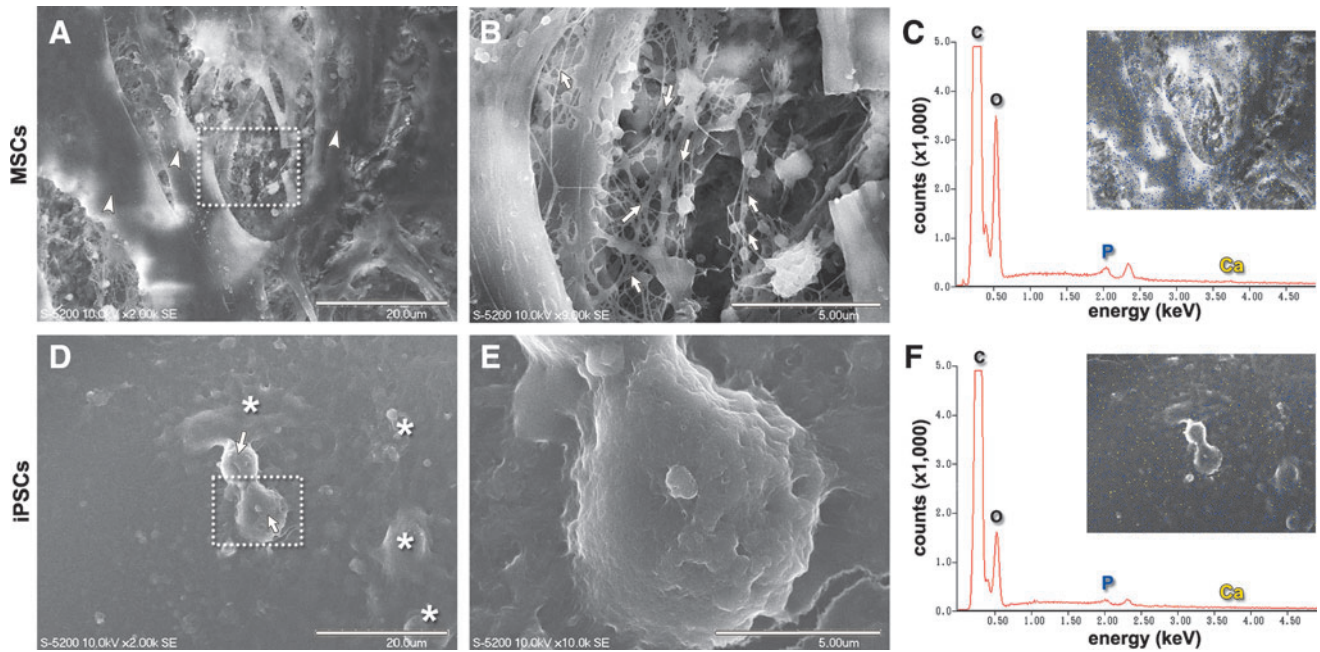

**SUPPLEMENTARY FIG. S1.** Scanning electron microscopy (SEM) observation of mesenchymal stem cells (MSCs) and induced pluripotent stem cells (iPSCs) cultured in the growth medium (nonosteogenic induction medium) for 30 days. **(A)** MSCs maintained a long spindle shape (*arrowheads*). Scale bar: 20 µm. **(B)** Magnification of the *dotted square* in **(A)**. Abundant fibrous structures (*arrows*) were observed in the intracellular spaces. Scale bar: 5 µm. **(D)** iPSCs proliferated and formed a multilayer, and flat cells (*asterisks*) and rounded cells (*arrows*) were observed. Scale bar: 20 µm. **(E)** Magnification of the *dotted square* in **(D)**. The surface of the rounded cell was smooth, and vesicle accretions were not observed on the cell. Scale bar: 5 µm. **(C, F)** Energy dispersive X-ray spectroscopy (EDX) analyses of the areas shown in SEM images **(A)** and **(D)**, respectively. The EDX graph indicates energy peaks of elemental carbon (C) and oxygen (O), but lacks peaks for phosphorous (P) and calcium (Ca).
