# Supplementary material
Source: PubMed Central journal article supplement (PMC4155416)
Supplement: Supp_Table1.pdf [file Supp_Table1.pdf]

SUPPLEMENTARY TABLE S1. FUNCTIONAL GENE GROUPING OF OSTEOGENESIS-RELATED GENES IN THE MOUSE OSTEOGENESIS RT<sup>2</sup> PROFILER<sup>TM</sup> PCR ARRAY (Qiagen: www.sabiosciences.com)

|                                             |                                                                                                                                                                                                                                                                                                                                                                                                                                                                                                   |
|---------------------------------------------|---------------------------------------------------------------------------------------------------------------------------------------------------------------------------------------------------------------------------------------------------------------------------------------------------------------------------------------------------------------------------------------------------------------------------------------------------------------------------------------------------|
| <i>Skeletal development</i>                 |                                                                                                                                                                                                                                                                                                                                                                                                                                                                                                   |
| Bone mineralization                         | <u>alpha-2-HS-glycoprotein (ahsg)</u> , <u>ameloblastin (ambn)</u> , enamel (enam), fibroblast growth factor receptor (fgfr) 2, smad1, <u>tuftelin 1 (tuft1)</u> .                                                                                                                                                                                                                                                                                                                                |
| Cartilage condensation                      | bone morphogenetic protein (bmp) receptor 1b, <u>collagen (coll) 1a1</u> , <u>col 2a1</u> , sox9.                                                                                                                                                                                                                                                                                                                                                                                                 |
| Ossification                                | <u>ahsg</u> , <u>ambn</u> , dentin matrix protein 1 (dmp1), enam, phosphate regulating gene with homologies to endopeptidases on the x chromosome (phex), <u>sclerostin (sost)</u> , tuftelin interacting protein 11 (tfip11), <u>tuft1</u> .                                                                                                                                                                                                                                                     |
| Osteoclast differentiation                  | tumor necrosis factor                                                                                                                                                                                                                                                                                                                                                                                                                                                                             |
| Other skeletal development genes            | <u>bmp 2</u> , <u>bmp 4</u> , <u>bmp 5</u> , <u>bmp 6</u> , <u>runx2</u> , transforming growth factor beta (tgfb) 1, vitamin d receptor (vdr).                                                                                                                                                                                                                                                                                                                                                    |
| <i>Bone mineral metabolism</i>              |                                                                                                                                                                                                                                                                                                                                                                                                                                                                                                   |
| Calcium ion binding and homeostasis         | annexin a5 (anxa5), bmp 1, cadherin 11 (cdh11), cartilage oligomeric matrix protein (comp), epidermal growth factor (egf), <u>matrix metalloproteinase (mmp) 2</u> , mmp 8, vdr.                                                                                                                                                                                                                                                                                                                  |
| Phosphate transport                         | bmp 5, col 10a1, <u>col 11a1</u> , <u>col 12a1</u> , <u>col 14a1</u> , <u>col 1a1</u> , <u>col 1a2</u> , col 2a1, col 3a1, <u>col 4a1</u> , <u>col 4a2</u> , col 5a1, col 6a1, <u>col 6a2</u> , col 7a1.                                                                                                                                                                                                                                                                                          |
| <i>Cell growth and differentiation</i>      |                                                                                                                                                                                                                                                                                                                                                                                                                                                                                                   |
| Regulation of cell cycle                    | <u>fibroblast growth factor (fgf) 1</u> , fgf 2, <u>fgf 3</u> , itgb1, platelet derived growth factor alpha (pdgfa), tgfb 1, tgfb 2, tgfb 3, vascular endothelial growth factor (vegf) a, vegf b.                                                                                                                                                                                                                                                                                                 |
| Cell proliferation                          | <u>fgf 1</u> , fgf 2, <u>fgf 3</u> , fgf receptor 2, pdgfa, smad3, tgfb 1, <u>tgfb 2</u> , tgfb 3, tgfb receptor (tgfr) 2, vegf a, vegf b.                                                                                                                                                                                                                                                                                                                                                        |
| Growth factors and receptors                | bmp 1, <u>bmp 2</u> , <u>bmp 3</u> , bmp 4, <u>bmp 5</u> , bmp 6, bmp receptor 1a, bmp receptor 1b, <u>colony stimulating factor (csf) 2</u> , csf 3, egf, <u>fgf 1</u> , fgf 2, <u>fgf 3</u> , fgf receptor 1, FMS-like tyrosine kinase 1 (flt1), <u>growth differentiation factor 10 (gdf10)</u> , insulin-like growth factor 1 (igf1), igf1 receptor, pdgfa, scavenger receptor class b member 1 (scarb1), tgfb 1, <u>tgfb 2</u> , tgfb 3, tgfr 1, tgfr 2, tgfr 3, vdr, vegfa, vegfb.          |
| Cell differentiation                        | <u>bmp 2</u> , bmp 4, <u>bmp 6</u> , <u>csf2</u> , fgf 2, igf1, <u>runx2</u> , smad2, sox9, tfip11, tgfr 2, twist1.                                                                                                                                                                                                                                                                                                                                                                               |
| <i>ECM proteins</i>                         |                                                                                                                                                                                                                                                                                                                                                                                                                                                                                                   |
| Basement membrane constituents              | <u>col 4a1</u> , <u>col 4a2</u> .                                                                                                                                                                                                                                                                                                                                                                                                                                                                 |
| Collagens                                   | <u>col 11a1</u> , <u>col 1a1</u> , <u>col 1a2</u> , col 2a1, col 3a1, <u>col 4a1</u> , <u>col 4a2</u> , col 5a1, col 6a1, <u>col 6a2</u> .                                                                                                                                                                                                                                                                                                                                                        |
| ECM protease inhibitors                     | <u>ahsg</u> , col 7a1, serine peptidase inhibitor clade h member 1.                                                                                                                                                                                                                                                                                                                                                                                                                               |
| ECM Proteases                               | bmp 1, <u>cathepsin k (ctsk)</u> , <u>mmp 10</u> , <u>mmp 2</u> , mmp 8, <u>mmp 9</u> , phex.                                                                                                                                                                                                                                                                                                                                                                                                     |
| Structural constituents of tooth enamel     | <u>ambn</u> , enam, <u>tuft1</u> .                                                                                                                                                                                                                                                                                                                                                                                                                                                                |
| Other ECM molecules                         | alkaline phosphatase, biglycan, <u>bmp 2</u> , bmp 4, <u>bmp 5</u> , bmp 6, bmp receptor 1a, col 10a1, <u>col 12a1</u> , <u>col 14a1</u> , comp, <u>csf2</u> , csf3, <u>dmp1</u> , egf, fgf 2, <u>fgf 3</u> , fgfr1, fgfr2, flt1, fibronectin 1 (fn1), <u>gdf10</u> , igf1, igf1r, integrin alpha (itga) 2, itga2b, <u>itgam</u> , integrin beta 1 (itgb1), pdgfa, <u>sost</u> , tfip11, tgfb 1, <u>tgfb 2</u> , tgfb 3, tgfr 1, tgfr 3, vascular cell adhesion molecule 1 (vcam1), vegfa, vegfb. |
| Cell-cell adhesion                          | cdh11, <u>intercellular adhesion molecule 1</u> , vcam1.                                                                                                                                                                                                                                                                                                                                                                                                                                          |
| Cell-matrix adhesion                        | itga 2, itga 2b, itga 3, itga m, itga v, itgb1.                                                                                                                                                                                                                                                                                                                                                                                                                                                   |
| Other cell adhesion molecules               | <u>cd36 antigen</u> , <u>col 11a1</u> , <u>col 12a1</u> , <u>col 14a1</u> , col 5a1, col 6a1, <u>col 6a2</u> , comp, fn1, scarb1.                                                                                                                                                                                                                                                                                                                                                                 |
| <i>Transcription factors and regulators</i> |                                                                                                                                                                                                                                                                                                                                                                                                                                                                                                   |
|                                             | msx1, NF-kappaB, <u>runx2</u> , smad1, smad2, smad3, smad4, sox9, twist1, vdr.                                                                                                                                                                                                                                                                                                                                                                                                                    |

Underlines: genes with more than 10-fold higher (*underline*) or lower (*double underline*) expression in iPSCs compared with MSCs on either day 10 or 30 of osteogenic induction. Genes in *italics* are expressed only in iPSCs and not in MSCs.

ECM, extracellular matrix; iPSCs, induced pluripotent stem cells; MSCs, mesenchymal stem cells.
